## ANESTHESIOLOGY

## Usefulness of Parasternal Intercostal Muscle Ultrasound during Weaning from Mechanical Ventilation

Martin Dres, M.D., Ph.D., Bruno-Pierre Dubé, M.D., M.Sc., Ewan Goligher, M.D., Ph.D., Stefannie Vorona, M.Sc., Suela Demiri, M.D., Elise Morawiec, M.D., Julien Mayaux, M.D., Laurent Brochard, M.D., Thomas Similowski, M.D., Ph.D., Alexandre Demoule, M.D., Ph.D.

ANESTHESIOLOGY 2020; 132:1114–25

## EDITOR'S PERSPECTIVE

## What We Already Know about This Topic

- Ultrasound can be used to assess work (*i.e.*, function) and weakness of the diaphragm. This can be helpful in predicting difficulty in weaning patients from mechanical ventilation.
- Patients who have weakness of the diaphragm may compensate with parasternal muscle activity. However, the feasibility of measuring parasternal intercostal muscle thickening with ultrasound and the ability of these measures to be combined with ultrasound evaluation of the diaphragm in order to predict ability to wean from mechanical ventilation has not been well explored.

## What This Article Tells Us That Is New

- Parasternal intercostal muscle thickness can be measured with ultrasound with good interobserver reproducibility.
- Parasternal intercostal muscle thickening was responsive to the level of ventilator assistance and significantly higher (*i.e.*, increased) in mechanically ventilated patients with diaphragm dysfunction.
- The pressure-generating capacity of the diaphragm, the diaphragm thickening fraction, and the parasternal intercostal muscle thickening fraction were all significantly associated with failure of a spontaneous breathing trial in mechanically ventilated patients.

This article is featured in "This Month in Anesthesiology," page 1A. This article is accompanied by an editorial on p. 947. Supplemental Digital Content is available for this article. Direct URL citations appear in the printed text and are available in both the HTML and PDF versions of this article. Links to the digital files are provided in the HTML text of this article on the Journal's Web site ([www.anesthesiology.org](http://www.anesthesiology.org)). This article has an audio podcast. This article has a visual abstract available in the online version. Part of the work presented in this article has been presented at the American Thoracic Society 2018 meeting in San Diego, California, May 18 to 23, 2018.

Submitted for publication June 6, 2019. Accepted for publication January 13, 2020. Published online first on February 18, 2020. From Public Assistance - Paris Hospital, Pitie-Salpetriere Hospital, Pneumology and Critical Care Department, Paris, France (M.D., B.-P.D., S.D., E.M., J.M., T.S., A.D.); Sorbonne University, Experimental and Clinical Neurophysiology Research Unit 1158, Paris, France (M.D., S.D., T.S., A.D.); St. Michael's Hospital, Li Ka Shing Knowledge Institute, Keenan Research Centre, Toronto, Ontario, Canada (M.D., L.B.); Medicine Department, Pneumology Department, Hotel Dieu Hospital, Montreal University Hospital Center, Montréal, Québec, Canada (B.-P.D.); Montreal University Hospital Center Research Center, Montréal, Québec, Canada (B.-P.D.); the Interdepartmental Division of Critical Care Medicine, University of Toronto, Toronto, Ontario, Canada (E.G., L.B.); and the Department of Medicine, Division of Respiratory, University Health Network and Mount Sinai Hospital, Toronto, Ontario, Canada (E.G., S.V.).

Copyright © 2020, the American Society of Anesthesiologists, Inc. All Rights Reserved. Anesthesiology 2020; 132:1114–25. DOI: 10.1097/ALN.0000000000003191

## ABSTRACT

**Background:** The assessment of diaphragm function with diaphragm ultrasound seems to bring important clinical information to describe diaphragm work and weakness. When the diaphragm is weak, extradiaphragmatic muscles may play an important role, but whether ultrasound can also assess their activity and function is unknown. This study aimed to (1) evaluate the feasibility of measuring the thickening of the parasternal intercostal and investigate the responsiveness of this muscle to assisted ventilation; and (2) evaluate whether a combined evaluation of the parasternal and the diaphragm could predict failure of a spontaneous breathing trial.

**Methods:** First, an exploratory evaluation of the parasternal in 23 healthy subjects. Second, the responsiveness of parasternal to several pressure support levels were studied in 16 patients. Last, parasternal activity was compared in presence or absence of diaphragm dysfunction (assessed by magnetic stimulation of the phrenic nerves and ultrasound) and in case of success/failure of a spontaneous breathing trial in 54 patients.

**Results:** The parasternal was easily accessible in all patients. The interobserver reproducibility was good (intraclass correlation coefficient, 0.77 [95% CI, 0.53 to 0.89]). There was a progressive decrease in parasternal muscle thickening fraction with increasing levels of pressure support (Spearman  $\rho = -0.61$  [95% CI,  $-0.74$  to  $-0.44$ ];  $P < 0.0001$ ) and an inverse correlation between parasternal muscle thickening fraction and the pressure generating capacity of the diaphragm (Spearman  $\rho = -0.79$  [95% CI,  $-0.87$  to  $-0.66$ ];  $P < 0.0001$ ). The parasternal muscle thickening fraction was higher in patients with diaphragm dysfunction: 17% (10 to 25) *versus* 5% (3 to 8),  $P < 0.0001$ . The pressure generating capacity of the diaphragm, the diaphragm thickening fraction and the parasternal thickening fraction similarly predicted failure or the spontaneous breathing trial.

**Conclusions:** Ultrasound assessment of the parasternal intercostal muscle is feasible in the intensive care unit and provides novel information regarding the respiratory capacity load balance.

(ANESTHESIOLOGY 2020; 132:1114–25)

Critically ill patients frequently develop respiratory muscle dysfunction that may contribute to difficult and prolonged weaning from mechanical ventilation. Monitoring of the respiratory muscles function is therefore very useful during the weaning process.<sup>1</sup> Through several approaches that include the assessment of respiratory muscles pressure generating capacity<sup>2</sup> or the use of electromyogram,<sup>3</sup> the evaluation of the respiratory capacity/load balance is possible at the bedside.<sup>1,4</sup> To this end, there has

been a growing interest in diaphragm ultrasound as it provides a direct visualization of the muscle and its functioning.<sup>5,6</sup> However, parasternal intercostal and neck muscles also contribute to the generation of tidal volume.<sup>7</sup> Their contribution is known to increase in case of diaphragm dysfunction or increased respiratory load.<sup>8,9</sup> As these situations are frequently encountered in the intensive care unit (ICU), parasternal intercostal muscle ultrasound could provide additional information in the assessment of the respiratory capacity/load balance. A study reported the feasibility and validity of parasternal intercostal muscle ultrasound in patients with stable chronic obstructive pulmonary disease (COPD).<sup>10</sup> This original approach echoes electromyographic findings where neural drive—as measured through surface electromyogram of the second intercostal space parasternal muscle—has been proven to predict the risk of clinical deterioration in chronic obstructive pulmonary disease inpatients.<sup>11</sup> Since limited research has focused on the use of parasternal intercostal muscle ultrasound, the present work aimed at evaluating the feasibility and reproducibility of measuring the parasternal intercostal muscle thickening and at investigating the responsiveness of parasternal intercostal muscle thickening to respiratory unloading during assisted ventilation. Secondary objectives were to investigate the relationship between parasternal intercostal muscle thickening and diaphragm function and to evaluate whether measuring parasternal intercostal muscle thickening could be helpful during the weaning process.

## Materials and Methods

The main study was divided into three substudies, all conducted between January 2015 and December 2016 at two sites: the outpatient clinic at the Toronto Western Hospital (Toronto, Canada) and the Respiratory and Medical Critical Care Department at Hôpital Pitié-Salpêtrière (Paris, France; see fig. 1 which displays characteristics of each substudy). Across three studies, parasternal intercostal ultrasound was performed in different conditions. All subjects, or their next of kin in the case of the critically ill patients, provided written informed consent. The study was approved by the Institutional Review Boards at both participating institutions (CPP6/84-14-2014-A01168-39, CPP6/52-14-2014-A00715-42; Toronto University Health Network, 15-8998) and was performed in accordance with the ethical standards set forth in the 2008 Declaration of Helsinki.

## Measurements

**Parasternal Intercostal Muscle Ultrasound.** The full detailed method for right parasternal intercostal ultrasound is reported in the Supplemental Digital Content 1 (<http://links.lww.com/ALN/C264>). A 10- to 15-MHz linear array transducer was positioned perpendicular to the anterior thorax surface in the longitudinal scan, at the level of the second right intercostal space, approximately 6 to 8 cm

lateral to the sternal edge with a window visualizing the second and third ribs. The second right parasternal intercostal muscle was identified as a three-layered biconcave structure: two linear hyperechoic membranes respectively running from the anterior and posterior aspects of the adjoining ribs, and a medial portion with muscle echotexture (fig. 2; and video in the Supplemental Digital Content 2, which is a cine loop of the parasternal intercostal ultrasound <http://links.lww.com/ALN/C265>). Using M-mode, the ultrasound beam was perpendicularly directed at the midsection of the muscle, where it is the thinnest at end-expiration. The thickness of the parasternal intercostal muscle was measured on frozen images at end expiration and at peak inspiration. Change in thickness determined the thickening fraction of the parasternal intercostal muscle as follows: parasternal intercostal muscle thickening equals peak inspiration thickness minus end-expiratory thickness divided by end-expiratory thickness. All measurements were repeated on at least three separate breaths and their average was reported. For the sake of feasibility and convenience, ultrasound was performed on the right parasternal intercostal muscle only.

**Diaphragm Ultrasound.** Diaphragm ultrasound was conducted using a 4- to 12-MHz linear array transducer (Sparq ultrasound system; Philips Healthcare, USA). Diaphragm thickness was measured at end expiration and at peak inspiration, and thickening fraction was calculated offline as follows: diaphragm thickening fraction equals peak inspiration thickness minus end-expiratory thickness divided by end-expiratory thickness. The full detailed method for diaphragm ultrasound has been reported elsewhere.<sup>12</sup>

**Phrenic Nerve Stimulation.** Diaphragm pressure generating capacity was assessed in terms of changes in endotracheal tube pressure induced by bilateral phrenic nerve stimulation during airway occlusion in substudy C. Phrenic nerve stimulation was performed by bilateral anterior magnetic stimulation as reported elsewhere<sup>4,13</sup> (see the Supplemental Digital Content 1 that displays a detailed description of the technique, <http://links.lww.com/ALN/C264>).

## Subjects and Studies Design

The study was made of three substudies named A, B, and C. Study A was a physiologic study dedicated to evaluate the reproducibility and values of parasternal intercostal muscle thickness and parasternal intercostal muscle thickening in healthy subjects. Healthy subjects were adults naive from smoking exposure and without previous history of cardiopulmonary or neuromuscular disease who were enrolled prospectively during a 6-month period. Parasternal intercostal muscle ultrasound was performed while subjects were breathing quietly, after a 30-min rest period. In random order, two observers, both experienced in respiratory muscles ultrasound, measured peak-inspiratory and

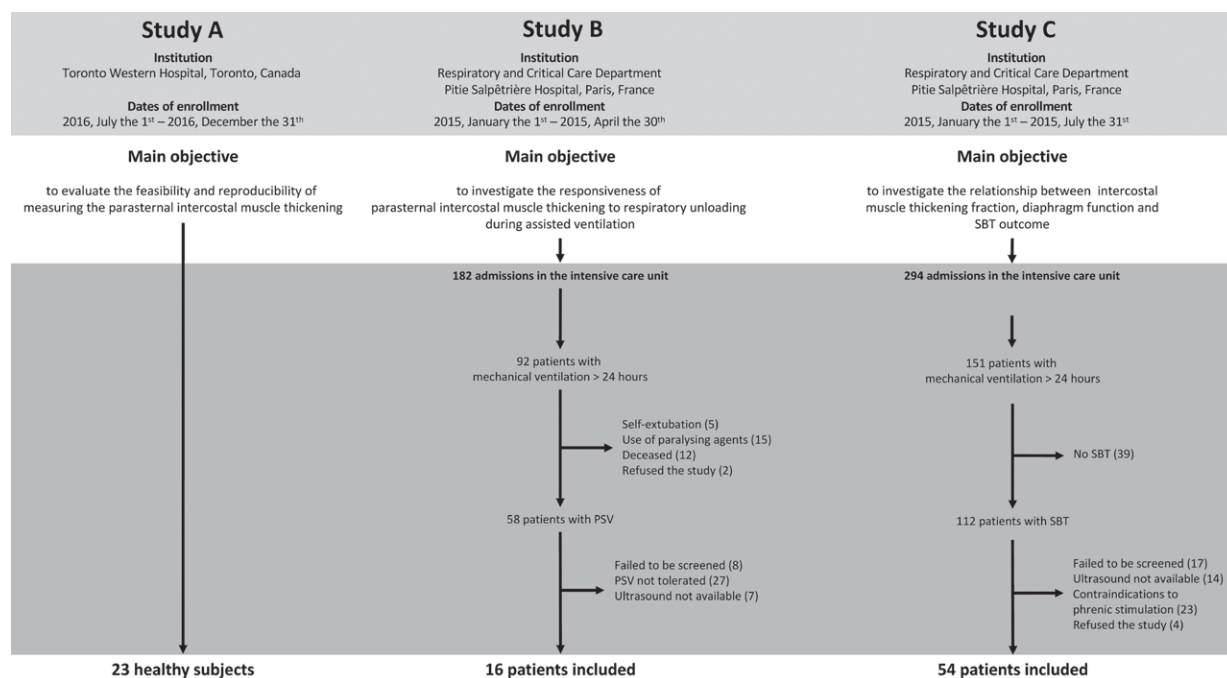

**Fig. 1.** Characteristics and flow chart of each sub-study. PSV, pressure support ventilation; SBT, spontaneous breathing trial.

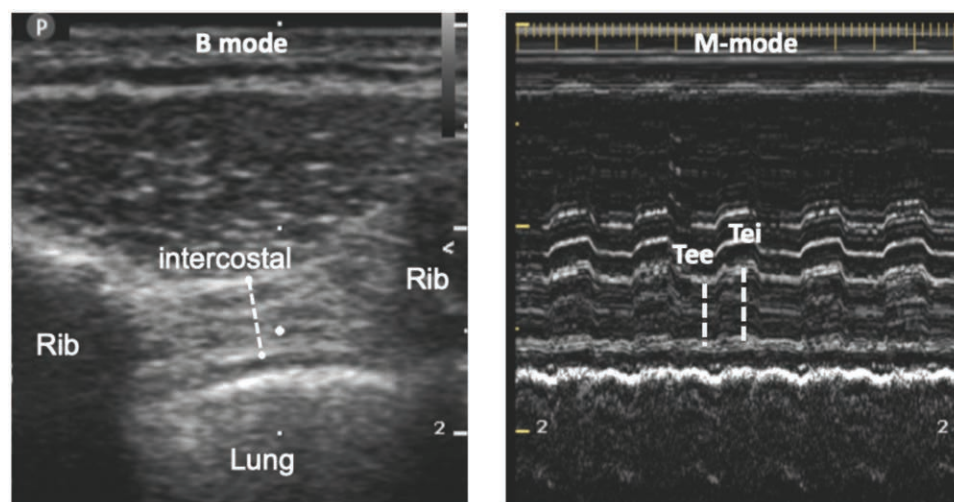

**Fig. 2.** Ultrasound of the right parasternal intercostal muscle. (Left) The parasternal intercostal muscle was identified as a three-layered biconcave structure: two linear hyperechoic membranes respectively running from the anterior and posterior aspects of the adjoining ribs, and a medial portion with muscle echotexture. Measurement in B-mode was taken at the central, thinnest section of the muscle (dotted line). (Right) Using M-mode, the thickness of the parasternal intercostal muscle was measured on frozen images at end-expiration (Tee) and end-inspiration (Tei).

end-expiratory thickness. Observers were blinded to each other's findings. Each observer performed two series of measurements separated by 20 min to allow intraobserver reproducibility calculation.

Study B was a physiologic study conducted in mechanically ventilated patients within the Respiratory and Critical Care Department at Hôpital Pitié-Salpêtrière. It aimed at assessing parasternal intercostal muscle thickening and

diaphragm thickening fraction at pressure support levels varying from the lowest to the highest to better describe the dose–response relationship. Patients were enrolled prospectively during a 4-month period. They were eligible if they had been invasively mechanically ventilated for more than 24 h through tracheal intubation and were currently ventilated in pressure support mode. The decision to initiate pressure support ventilation was taken by the attending physician who was not involved in the study (see Supplemental Digital Content 1 for the criteria used to initiate pressure support mode, <http://links.lww.com/ALN/C264>). Parasternal intercostal muscle ultrasound was performed at the following pressure support levels applied in a random sequence order: 5, 10, 15, and 20 cm H<sub>2</sub>O while positive end-expiratory pressure (PEEP) was set to 5 cm H<sub>2</sub>O. In addition, a last condition was studied with a pressure support of 7 cm H<sub>2</sub>O and PEEP set to 0 cm H<sub>2</sub>O. Inspired fraction of oxygen was set to 30% in all cases and was not changed during the study. Investigators conducting ultrasound measurements were blinded to ventilator settings. Each condition was maintained for 10 min and ultrasound measurements were performed during the last 2 min. Ultrasound measurements were performed by a physician with experience in respiratory muscle ultrasound. A 5-min resting period during which the initial ventilator settings were reapplied was allowed between conditions.

Study C was part of a clinical study conducted in mechanically ventilated patients within the Respiratory and Critical Care Department at Hôpital Pitié-Salpêtrière.<sup>12</sup> Some data from this cohort have been published elsewhere.<sup>12–14</sup> This primary study aimed to determine the prevalence and impact of diaphragm dysfunction at the time of weaning and evaluate the potential interest of respiratory muscles ultrasound in mechanically ventilated patients. Study C aimed at investigating the relationship between parasternal intercostal muscle thickening and diaphragm pressure-generating capacity, as well as weaning outcome. Study C enrolled patients prospectively during an 8-month period. Patients were eligible if they had been mechanically ventilated through an endotracheal tube for more than 24 h and were deemed ready to undergo a first spontaneous breathing trial as decided by their attending physician according to criteria derived from the International Conference on Weaning (see the Supplemental Digital Content 1 for a full description of the weaning protocol, <http://links.lww.com/ALN/C264>).<sup>15</sup> Noninclusion criteria for this study were mainly related to contraindication to magnetic stimulation of the phrenic nerves. Diaphragm function was assessed in term of change in bilateral phrenic nerve stimulation.<sup>4</sup> A bilateral phrenic nerve stimulation less than 11 cm H<sub>2</sub>O was used to define diaphragm dysfunction.<sup>4,13</sup> After this, parasternal intercostal ultrasound and diaphragm ultrasound was performed while patients were ventilated under pressure support ventilation with PEEP of 5 cm H<sub>2</sub>O and pressure support set to reach a tidal volume of 6 to 8 ml/

kg of predicted ideal body weight. Then, a 30-min spontaneous breathing trial performed under a pressure support of 7 cm H<sub>2</sub>O and PEEP set to zero was performed. The spontaneous breathing trial was defined as successful if patients had no sign of clinical intolerance during all the 30-min period. Otherwise, the spontaneous breathing trial was defined as a failure. In a subset of 15 patients from this sub-study, ultrasound measurement of end-expiratory thickness and peak-inspiratory thickness and parasternal intercostal muscle thickening were assessed by two observers to assess interobserver reliability.

## Statistical Analyses

Normality of the distribution of variables was assessed using the Kolmogorov–Smirnov test. Variables are presented as median (interquartile range) or number (%).

All three studies were conducted prospectively and index tests were planned before data collection. Two observers performed ultrasound to assess reproducibility of parasternal intercostal muscle measurements in healthy (Study A) and in patients (Study C). Reproducibility of diaphragm ultrasound has been reported elsewhere.<sup>16,17</sup>

For Study A, intra- and interrater reliability was analyzed using intraclass correlation coefficient for parasternal intercostal end-expiratory thickness, peak-inspiratory thickness, and parasternal intercostal muscle thickening. Parasternal intercostal end-expiratory thickness, peak-inspiratory thickness, and parasternal intercostal muscle thickening between females and males were compared by Mann–Whitney test. As an exploratory study, sample size was estimated from previous publications<sup>17–19</sup> and a convenience sample of 23 subjects was deemed necessary.

For Study B, Friedman test and Dunn multiple comparisons were used to compare the different values of parasternal intercostal muscle thickening and diaphragm thickening fraction across conditions. Sample size was estimated from previous publications<sup>17,20</sup> and a convenience sample of 16 patients was deemed necessary.

For Study C, the relationship between airway opening pressure in response to bilateral phrenic nerve stimulation and parasternal intercostal muscle thickening was evaluated using Spearman correlation. Differences between patients with and without diaphragm dysfunction, and between those with spontaneous breathing trial failure or success were assessed using Mann–Whitney test or chi-square tests, where appropriate. The article conforms to the “Essential Items for Reporting Diagnostic Accuracy Studies” checklist for reporting of studies of diagnostic accuracy.<sup>21</sup> The relationship between parasternal intercostal muscle thickening and diaphragm thickening fraction was assessed by computing the ratio of parasternal intercostal muscle thickening to diaphragm thickening fraction. Receiver operating characteristic curves were constructed to evaluate the performance of four indices to predict weaning failure: airway opening pressure in response to bilateral phrenic nerve stimulation,



diaphragm thickening fraction, parasternal intercostal muscle thickening, and parasternal intercostal muscle thickening to diaphragm thickening fraction ratio. Sensitivities, specificities, positive and negative predictive values, positive and negative likelihood ratios, and areas under the receiver operating characteristic curves were calculated. Areas under the receiver operating characteristic curves were performed to identify optimal cut-off values in predicting failure, and these estimates were obtained using bootstrapping with 1,000 replications. The best threshold value for each index was determined as the value associated with the best Youden index for the prediction of failure. Areas under the receiver operating characteristic curves were compared using the nonparametric approach of DeLong *et al.*<sup>22</sup> Interobserver reliability of the parasternal intercostal muscle ultrasound measurements was assessed using intraclass coefficient correlation in a subset of 15 patients. In this cohort, interobserver reliability of the diaphragm ultrasound measurements has already been reported elsewhere.<sup>12</sup> There was no missing data nor loss of follow-up. In all cases, a *P* value < 0.05 was considered statistically significant and two-tailed testing was used to test the hypothesis. All analyses were performed using SPSS, v.21 (IBM, USA) and MedCalc Software (bvba, Ostend, Belgium).

## Results

### Substudy A: Healthy Subjects

Twenty-three subjects were recruited. Values of parasternal intercostal end-expiratory thickness and peak-inspiratory thickness were higher in men than in women, but values of parasternal intercostal muscle thickening were similar between genders (table 1). Intraclass coefficient correlation between observers for the measurements of parasternal intercostal end-expiratory thickness and peak-inspiratory thickness were 0.92 (CI 95%, 0.82 to 0.96) and 0.92 (CI 95%, 0.82 to 0.96), respectively, and only 0.77 (CI 95%, 0.53 to 0.89) for parasternal intercostal muscle thickening, but parasternal intercostal muscle thickening values were very

low in these healthy subjects at rest (median, 3%; CI 95%, 2 to 5; fig. 3). Table E1, Supplemental Digital Content 1 (<http://links.lww.com/ALN/C264>) displays the intra-class correlation coefficients of parasternal intercostal muscle ultrasound measurements.

### Study B: Parasternal Intercostal Muscle Responsiveness to Ventilatory Support

Sixteen patients participated in Study B (fig. 1 shows the flow chart of the study). Their main characteristics are described in table 2. The highest parasternal intercostal muscle thickening and diaphragm thickening fraction were measured with pressure support level of 7 cm H<sub>2</sub>O and PEEP of 0 cm H<sub>2</sub>O, and the lowest parasternal intercostal muscle thickening and diaphragm thickening fraction were measured with a pressure support level of 20 cm H<sub>2</sub>O and PEEP of 5 cm H<sub>2</sub>O (fig. 2; and fig. E1 in Supplemental Digital Content 1 displays the simultaneous changes in diaphragm thickening fraction and parasternal intercostal muscle thickening [<http://links.lww.com/ALN/C264>]). There was a correlation between pressure support level and parasternal intercostal muscle thickening (Spearman  $\rho = -0.61$  [CI 95%, -0.74 to -0.44]; *P* < 0.0001).

### Study C: Parasternal Intercostal Muscle, Diaphragm Function, and Weaning Outcome

Of the 294 patients admitted during the study period, 54 were enrolled in Study C (fig. 1 shows the flow chart of the study). Patient characteristics are displayed in table 2. Among them, 33 (61%) had diaphragm dysfunction and 21 (39%) did not. Pressure support and PEEP level were similar in the two groups, but tidal volume was lower in patients with diaphragm dysfunction (table 3). Table E1 in Supplemental Digital Content 1 (<http://links.lww.com/ALN/C264>) displays the intraclass correlation coefficients of parasternal intercostal muscle ultrasound measurements. **Relationship between Parasternal Intercostal Muscle and Diaphragm Function.** Patients with diaphragm dysfunction had higher parasternal intercostal muscle thickening

**Table 1.** Characteristics and Parasternal Intercostal Muscle Measurements in Healthy Subjects (Study A)

|                                    | All              | Male             | Female           | <i>P</i> Value |
|------------------------------------|------------------|------------------|------------------|----------------|
| Characteristics, n                 | 23               | 11               | 12               |                |
| Age, yr                            | 27 (25–36)       | 34 (26–36)       | 26 (24–29)       | 0.956          |
| Weight, kg                         | 67 (59–75)       | 75 (72–82)       | 60 (57–65)       | < 0.0001       |
| Height, cm                         | 1.70 (1.62–1.81) | 1.81 (1.70–1.85) | 1.63 (1.60–1.71) | 0.001          |
| Body mass index, kg/m <sup>2</sup> | 23 (21–25)       | 24 (23–26)       | 22 (20–24)       | 0.087          |
| Intercostal muscle ultrasound      |                  |                  |                  |                |
| End-inspiratory thickness, mm      | 2.8 (2.2–3.4)    | 3.3 (2.6–3.8)    | 2.2 (2.0–2.8)    | < 0.0001       |
| End-expiratory thickness, mm       | 2.8 (2.1–3.3)    | 3.3 (2.8–3.9)    | 2.1 (1.9–2.8)    | < 0.0001       |
| Thickening fraction, %             | 3 (2–5)          | 3 (2–5)          | 3 (0–5)          | 0.732          |

Comparisons were made between males and females (Mann–Whitney test).

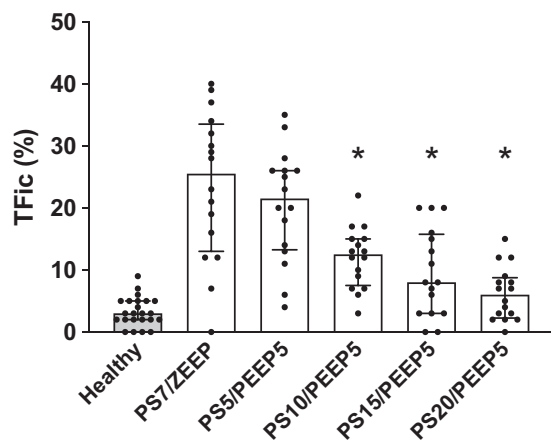

**Fig. 3.** Parasternal intercostal muscle thickening fraction (TFic) (median, interquartile) at various levels of pressure support ([PS] 5, 7, 10, 15, 20) and positive end-expiratory pressure (PEEP) and zero end-expiratory pressure (ZEEP), and in the 23 healthy subjects breathing at rest (grey bar). \* $P < 0.05$  as compared to PS7 and ZEEP.

**Table 2.** Baseline Characteristics of ICU Patients Enrolled in Substudies B and C

|                                          | Study B<br>(n = 16) | Study C<br>(n = 54) |
|------------------------------------------|---------------------|---------------------|
| Male, n (%)                              | 8 (50)              | 39 (72)             |
| Age, yr                                  | 64 (59–78)          | 58 (48–67)          |
| SOFA score                               | 8 (5–12)            | 5 (4–8)             |
| Body mass index, kg/m <sup>2</sup>       | 23 (21–27)          | 24 (22–28)          |
| Length of stay at inclusion, days        | 3 (2–6)             | 4 (2–6)             |
| Length of MV at inclusion, days          | 3 (2–6)             | 4 (2–5)             |
| Comorbidities, n (%)                     |                     |                     |
| Cirrhosis                                | 5 (31)              | 12 (22)             |
| COPD                                     | 3 (19)              | 13 (24)             |
| Central neurological disorders           | 5 (31)              | 14 (26)             |
| Reason for ICU admission, n (%)          |                     |                     |
| Respiratory failure                      | 7 (44)              | 20 (37)             |
| Shock                                    | 4 (25)              | 20 (37)             |
| Coma                                     | 5 (31)              | 14 (26)             |
| Physiologic variables at inclusion       |                     |                     |
| Heart rate, min <sup>-1</sup>            | 87 (76–98)          | 90 (78–104)         |
| Mean arterial pressure, mmHg             | 85 (70–102)         | 79 (68–97)          |
| Respiratory rate, min <sup>-1</sup>      | 24 (17–26)          | 21 (19–25)          |
| Arterial blood gases at inclusion        |                     |                     |
| pH                                       | 7.45 (7.41–7.48)    | 7.43 (7.37–7.45)    |
| Paco <sub>2</sub> , mmHg                 | 37 (33–41)          | 38 (38–46)          |
| Pao <sub>2</sub> /Fio <sub>2</sub> ratio | 280 (227–325)       | 260 (205–332)       |

Data presented as n (%) or median (interquartile range).

COPD, chronic obstructive pulmonary disease; Fio<sub>2</sub>, inspired fraction of oxygen; ICU, intensive care unit; MV, mechanical ventilation; Paco<sub>2</sub>, arterial partial pressure of carbon dioxide; Pao<sub>2</sub>, arterial partial pressure of oxygen; SOFA, sequential organ failure assessment.

compared to patients without diaphragm dysfunction (table 3). There was an inverse curvilinear correlation between airway opening pressure in response to bilateral phrenic nerve stimulation and parasternal intercostal muscle thickening (Spearman  $\rho = -0.79$  [CI 95%,  $-0.87$  to  $-0.66$ ];  $P < 0.0001$ ; fig. 4).

**Relationship between Parasternal Intercostal Muscle, Diaphragm Function, and Weaning Outcome.** Among the 54 included patients, 22 (41%) failed the spontaneous breathing trial (table 4). Patients who failed spontaneous breathing trial had lower airway opening pressure in response to bilateral phrenic nerve stimulation, lower diaphragm thickening fraction, higher parasternal intercostal muscle thickening and lower parasternal intercostal muscle to diaphragm thickening fraction ratio (table 4). Predictive performances and best cut-offs of the four indices to predict failure are displayed in table 5. No difference was found between areas under the receiver operating characteristic curves of the four indices (table E2 in Supplemental Digital Content 1 shows the comparison of areas under the receiver operating characteristic curves of the four indices to predict spontaneous breathing trial failure [http://links.lww.com/ALN/C264]).

## Discussion

The main findings are summarized as follows: (1) measurement of parasternal intercostal muscle thickening was feasible and reproducible; (2) parasternal intercostal muscle thickening was responsive to respiratory load; (3) a greater parasternal intercostal muscle thickening under pressure support ventilation was associated with diaphragm dysfunction and failure of a spontaneous breathing trial; and (4) parasternal intercostal muscle thickening in combination with diaphragm thickening fraction gave similar information than parasternal intercostal muscle thickening alone.

## Anatomy and Physiology of Intercostal Muscles

The intercostal muscles form two thin layers that span each of the intercostal spaces. Ventrally, between the sternum and the chondrocostal junctions, the external intercostal muscles are replaced by a fibrous aponeurosis conventionally called the “parasternal intercostal muscles.” In dogs, parasternal intercostal denervation significantly decreases the expansion of the rib cage during inspiration.<sup>23</sup> In humans, electrophysiologic data suggest that parasternal intercostal muscles have an inspiratory mechanical advantage and that this advantage decreases gradually from the second to the fifth interspace.<sup>24</sup> The parasternal intercostal muscles are active only during the inspiratory phase of the breathing cycle and interact together with the diaphragm and other extradiaphragmatic inspiratory muscles. By contrast to other extradiaphragmatic inspiratory muscles, such as scalens or sternocleidomastoids located in the neck, the ultrasound window of parasternal intercostal has the advantage to be usually free of healthcare equipment (tracheostomy,

**Table 3.** Characteristics of Patients (Study C) According to the Presence of Diaphragm Dysfunction

|                                                                                        | Diaphragm Dysfunction<br>(n=33) | No Diaphragm Dysfunction<br>(n=21) | P Value  |
|----------------------------------------------------------------------------------------|---------------------------------|------------------------------------|----------|
| Sex, males n (%)                                                                       | 24 (73)                         | 15 (71)                            | 0.999    |
| Age, yr                                                                                | 61 (52–69)                      | 56 (44–64)                         | 0.111    |
| Body mass index, kg/m <sup>2</sup>                                                     | 24 (21 to 27)                   | 25 (24–28)                         | 0.457    |
| Length of stay at inclusion, days                                                      | 4 (2–7)                         | 3 (2–6)                            | 0.289    |
| Length of MV at inclusion, days                                                        | 4 (2–5)                         | 3 (2–5)                            | 0.510    |
| SBT failure, n (%)                                                                     | 22 (67)                         | 0 (0)                              | < 0.0001 |
| Ventilator settings                                                                    |                                 |                                    |          |
| Pressure support, cm H <sub>2</sub> O                                                  | 10 (8–10)                       | 10 (8–10)                          | 0.397    |
| PEEP, cm H <sub>2</sub> O                                                              | 5 (5–5)                         | 5 (5–5)                            | 0.709    |
| Tidal volume, ml/kg PBW                                                                | 6.9 (5.8–7.8)                   | 7.0 (5.9–8.3)                      | 0.004    |
| FiO <sub>2</sub> , %                                                                   | 30 (30–40)                      | 30 (30–30)                         | 0.526    |
| Respiratory rate, min <sup>-1</sup>                                                    | 22 (20–25)                      | 21 (18–25)                         | 0.746    |
| Arterial blood gases at inclusion                                                      |                                 |                                    |          |
| pH                                                                                     | 7.41 (7.36–7.45)                | 7.44 (7.42–7.45)                   | 0.182    |
| PaCO <sub>2</sub> , mmHg                                                               | 41 (35–49)                      | 37 (33–39)                         | 0.079    |
| PaO <sub>2</sub> /FiO <sub>2</sub> ratio                                               | 257 (207–313)                   | 266 (216–389)                      | 0.325    |
| Bicarbonates, mmol/l                                                                   | 25 (23–28)                      | 25 (21–27)                         | 0.684    |
| Diaphragm function                                                                     |                                 |                                    |          |
| Ptr,stim, cm H <sub>2</sub> O                                                          | 6.0 (4.0–7.5)                   | 14.0 (12.2–17.2)                   | < 0.0001 |
| Parasternal intercostal muscle ultrasound                                              |                                 |                                    |          |
| End-expiratory thickness, mm                                                           | 3.9 (3.2–5.2)                   | 4.0 (3.1–5.0)                      | 0.758    |
| End-inspiratory thickness, mm                                                          | 4.8 (3.9–6.2)                   | 4.2 (3.3–5.4)                      | 0.430    |
| Thickening fraction, %                                                                 | 17 (10–25)                      | 5 (3–8)                            | < 0.003  |
| Diaphragm ultrasound                                                                   |                                 |                                    |          |
| End-expiratory thickness, mm                                                           | 2.2 (1.9–2.4)                   | 2.4 (2.1–2.7)                      | 0.272    |
| End-inspiratory thickness, mm                                                          | 2.6 (2.4–2.9)                   | 3.3 (2.9–3.7)                      | 0.002    |
| Thickening fraction, %                                                                 | 19 (16–23)                      | 39 (34–44)                         | < 0.0001 |
| Parasternal intercostal muscle thickening fraction/Diaphragm thickening fraction ratio | 0.9 (0.4–1.5)                   | 0.2 (0.1–0.2)                      | 0.003    |

Data presented as n (%) or median (interquartile).

FiO<sub>2</sub>, inspired fraction of oxygen; MV, mechanical ventilation; PaCO<sub>2</sub>, arterial partial pressure of carbon dioxide; PaO<sub>2</sub>, arterial partial pressure of oxygen; PBW, predicted body weight; PEEP, positive end-expiratory pressure; Ptr,stim, airway opening pressure in response to bilateral phrenic nerve stimulation; SBT, spontaneous breathing trial.

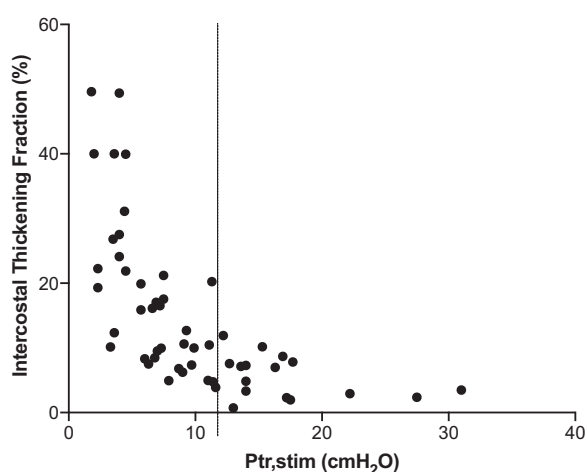

**Fig. 4.** Relationship between parasternal intercostal muscle thickening fraction and diaphragm pressure-generating capacity as assessed with airway opening pressure in response to bilateral phrenic nerve stimulation (Ptr,stim). The dotted line represents the Ptr,stim cut-off of 11 cm H<sub>2</sub>O under which diaphragm dysfunction is classically defined (2).

intravascular lines). This study endeavored to investigate with ultrasound the parasternal intercostal activity.

### Parasternal Intercostal Muscle Thickening as a Bedside Indicator of the Respiratory Load–Capacity Balance

Extradaphragmatic inspiratory muscles are responsive to respiratory load.<sup>25,26</sup> In the intensive care unit, extradiaphragmatic inspiratory muscle electromyogram activity is a surrogate of respiratory drive.<sup>3</sup> As a matter of fact, increased extradiaphragmatic inspiratory muscle electromyogram activity is associated with an insufficient level of inspiratory pressure support during weaning from mechanical ventilation,<sup>27</sup> weaning failure,<sup>8</sup> and dyspnea.<sup>3</sup> In addition, the electromyographic activity of the parasternal intercostal muscle, is a marker of treatment response and predicts the outcome during acute exacerbation of COPD.<sup>11,28</sup> Our results confirm these data as we report a dose–response relationship between parasternal intercostal muscle thickening fraction and respiratory load (Study B). This relationship suggests that the parasternal intercostal muscle thickening fraction is a relevant tool to assess the load–capacity balance in critically ill patients. Our approach was to use

**Table 4.** Characteristics of Patients (Study C) According to the Outcome of the Spontaneous Breathing Trial

|                                                                                        | SBT Failure<br>(n=22) | SBT Success<br>(n=32) | P Value  |
|----------------------------------------------------------------------------------------|-----------------------|-----------------------|----------|
| Sex, males n (%)                                                                       | 16 (73)               | 23 (72)               | 0.999    |
| Age, yr                                                                                | 62 (52–69)            | 57 (44–65)            | 0.260    |
| BMI, kg/m <sup>2</sup>                                                                 | 24 (22–28)            | 25 (22–27)            | 0.544    |
| Length of stay at inclusion, days                                                      | 5 (3–9)               | 3 (1–5)               | 0.017    |
| Length of MV at inclusion, days                                                        | 5 (3–7)               | 3 (1–5)               | 0.011    |
| Main reason for intubation                                                             |                       |                       |          |
| Acute respiratory failure, n (%)                                                       | 9 (41)                | 10 (31)               | 0.566    |
| Shock, n (%)                                                                           | 9 (41)                | 12 (38)               | 0.999    |
| Coma, n (%)                                                                            | 3 (14)                | 10 (31)               | 0.199    |
| Ventilator settings at inclusion                                                       |                       |                       |          |
| Pressure support level, cm H <sub>2</sub> O                                            | 10 (8–10)             | 10 (8–10)             | 0.452    |
| PEEP, cm H <sub>2</sub> O                                                              | 5 (5–5)               | 5 (5–5)               | 0.558    |
| Tidal volume, ml/kg PBW                                                                | 6.7 (5.6–8.0)         | 7.1 (5.9–8.8)         | 0.109    |
| Respiratory rate, min <sup>-1</sup>                                                    | 22 (20–26)            | 21 (19–25)            | 0.399    |
| Arterial blood gases at inclusion                                                      |                       |                       |          |
| pH                                                                                     | 7.40 (7.36–7.45)      | 7.44 (7.41–7.45)      | 0.064    |
| Paco <sub>2</sub> , mmHg                                                               | 44 (36–50)            | 37 (33–40)            | 0.008    |
| Pao <sub>2</sub> /Fio <sub>2</sub> ratio                                               | 231 (200–295)         | 300 (236–393)         | 0.012    |
| Bicarbonates, mmol/l                                                                   | 27 (24–30)            | 24 (21–26)            | 0.303    |
| Diaphragm function                                                                     |                       |                       |          |
| Ptr,stim, cm H <sub>2</sub> O                                                          | 8.9 (5.7–13)          | 11.9 (8.9–11.5)       | < 0.0001 |
| Parasternal intercostal muscle ultrasound                                              |                       |                       |          |
| End-expiratory thickness, mm                                                           | 3.9 (3.1–4.7)         | 3.9 (3.2–5.3)         | 0.658    |
| End-inspiratory thickness, mm                                                          | 4.8 (3.9–5.5)         | 4.1 (3.5–5.9)         | 0.373    |
| Thickening fraction, %                                                                 | 18 (10–33)            | 7 (4–10)              | < 0.0001 |
| Diaphragm ultrasound                                                                   |                       |                       |          |
| End-expiratory thickness, mm                                                           | 2.3 (2.0–2.5)         | 2.3 (1.9–2.6)         | 0.939    |
| End-inspiratory thickness, mm                                                          | 2.6 (2.3–2.9)         | 3.0 (2.7–3.3)         | 0.117    |
| Thickening fraction, %                                                                 | 17 (13–21)            | 34 (29–38)            | < 0.0001 |
| Parasternal intercostal muscle thickening fraction/Diaphragm thickening fraction ratio | 1.3 (0.7–2.1)         | 0.2 (0.1–0.4)         | < 0.0001 |

Data presented as n (%) or median (interquartile).

BMI, body mass index; Fio<sub>2</sub>, inspired fraction of oxygen; MV, mechanical ventilation; Paco<sub>2</sub>, arterial partial pressure of carbon dioxide; Pao<sub>2</sub>, arterial partial pressure of oxygen; PBW, predicted body weight; PEEP, positive end-expiratory pressure; Ptr,stim, airway opening pressure in response to bilateral phrenic nerve stimulation; SBT, spontaneous breathing trial.

**Table 5.** Threshold, AUC-ROC, Sensitivity, Specificity, Positive and Negative Likelihood Ratios, and Positive and Negative Predictive Values of Endotracheal Pressure Induced by a Ptr,stim, Diaphragm Thickening Fraction, Parasternal Intercostal Muscle Thickening Fraction, and Parasternal Intercostal Muscle Thickening Fraction/Diaphragm Thickening Fraction Ratio to Predict Failure of the Spontaneous Breathing Trial

|                                                                                  | Threshold               | AUC-ROC<br>(95% CI) | Sensitivity, %<br>(95% CI) | Specificity, %<br>(95% CI) | Likelihood Ratios (95% CI) |                  | Predictive Values, %<br>(95% CI) |               |
|----------------------------------------------------------------------------------|-------------------------|---------------------|----------------------------|----------------------------|----------------------------|------------------|----------------------------------|---------------|
|                                                                                  |                         |                     |                            |                            | Positive                   | Negative         | Positive                         | Negative      |
| Ptr,stim                                                                         | 7.5 cm H <sub>2</sub> O | 0.91 (0.80–0.97)    | 91 (71–99)                 | 81 (64–93)                 | 4.85 (2.30–10.10)          | 0.11 (0.03–0.40) | 77 (62–87)                       | 93 (77–98)    |
| Diaphragm thickening fraction                                                    | 28.7 %                  | 0.88 (0.77–0.95)    | 95 (77–100)                | 72 (53–86)                 | 3.39 (1.90–5.90)           | 0.06 (0.01–0.40) | 70 (57–80)                       | 96 (77–99)    |
| Parasternal intercostal muscle thickening fraction                               | 9.5 %                   | 0.88 (0.76–0.95)    | 91 (71–99)                 | 72 (53–86)                 | 3.23 (1.80–5.70)           | 0.13 (0.03–0.50) | 69 (56–80)                       | 92 (75–98)    |
| Parasternal intercostal muscle thickening fraction/Diaphragm thickening fraction | 0.35                    | 0.92 (0.81–0.98)    | 100 (85–100)               | 78 (60–91)                 | 4.62 (2.40–8.80)           | 0.02 (0.01–0.20) | 76 (62–86)                       | 100 (100–100) |

AUC-ROC, area under the receiver operating characteristics curves; CI, confidence interval; Ptr,stim, airway opening pressure in response to bilateral phrenic nerve stimulation.



ultrasound, a noninvasive tool that is widely available and provides a real-time assessment of muscle contraction. Data on parasternal intercostal muscle ultrasound are scarce. In an animal model, ultrasound morphometric assessment of the intercostal parasternal muscle was similar to measurement performed directly on the specimen, demonstrating the ability of ultrasound to accurately estimate the anatomical structure of the parasternal intercostal muscle.<sup>29</sup> In addition, the good interobserver repeatability of the ultrasound measurement of parasternal intercostal muscle thickness has also been reported in humans,<sup>10,29,30</sup> and is in line with our own reproducibility findings. It suggests that ultrasound measurement of parasternal intercostal thickness and thickening fraction is feasible and reproducible, and that the technique can reliably be employed. Remarkably, the parasternal intercostal muscle thickness was higher for the ICU patients than for the healthy subjects, but similar to what has been reported in COPD patients.<sup>10</sup> While the exact reasons of this increase in thickness is unclear (edema, inflammation, injury), it may reflect an overrecruitment of the extradiaphragmatic muscles that occurs in the ICU patients. Further studies will have to specifically focus on this point.

### Relationship between Parasternal Intercostal Muscle Thickening and Diaphragm Function

The relationship between diaphragm function and the recruitment of extradiaphragmatic inspiratory muscles has been described in animal models and in humans, although few data are available in ICU patients.<sup>8,31–34</sup> The diaphragm is the main inspiratory muscle and diaphragm dysfunction elicits a series of adaptive mechanisms that enable ventilation and pulmonary gas exchange to be maintained within reasonable limits. Patients with chronic diaphragm dysfunction exhibit an increase in extradiaphragmatic inspiratory muscles contraction that is associated with respiratory discomfort.<sup>35,36</sup> Conversely, diaphragm paralysis results in a marked increase in parasternal intercostal muscle activity, while minute ventilation is relatively unaffected.<sup>31,37</sup> In situation of high respiratory drive, diaphragm dysfunction is associated with a significant increase in the contractile activity of the extradiaphragmatic respiratory muscles.<sup>31,32</sup> The extradiaphragmatic respiratory muscles recruitment is therefore a mechanism of compensation that can be activated in presence of diaphragm dysfunction. We evidenced this mechanism in our patients by showing a higher parasternal intercostal muscle thickening in those who had a diaphragm dysfunction as compared to their counterparts. Difference between groups was very clear as the parasternal intercostal muscle thickening value in patients with diaphragm dysfunction was on average three times higher than in patients without diaphragm dysfunction. Moreover, we observed a negative curvilinear relationship between parasternal intercostal muscle thickening and diaphragm function. It suggests an exponential increase in parasternal intercostal muscle thickening under a critical value of bilateral phrenic nerve stimulation. In our patients, this value

appeared lower than the bilateral phrenic nerve stimulation threshold that classically defines diaphragm dysfunction. This finding suggests that the recruitment of parasternal intercostal muscle may start before diaphragm dysfunction—as it is classically defined<sup>28,29</sup>—is fully constituted. Subsequently, documenting such recruitment by ultrasound may encourage clinicians to raise the hypothesis of a diaphragm dysfunction. Alternatively, it may also indicate underassistance and may encourage caregivers to optimize the ventilator settings.

### Parasternal Intercostal Muscle Thickening, Diaphragm Thickening Fraction, and Weaning Outcome

Diaphragm function is an important determinant of spontaneous breathing trial outcome. However, investigating diaphragm function at bedside in the ICU setting may be a challenge.<sup>13,38</sup> Diaphragm thickening fraction can be used as a surrogate of diaphragm function and is a reliable predictor of spontaneous breathing trial outcome.<sup>5</sup> However, a recent study highlighted that diaphragm ultrasound doesn't allow to predict extubation failure,<sup>39</sup> justifying to explore extradiaphragmatic muscles. In the current study, we sought to examine whether either parasternal intercostal muscle thickening or the addition of parasternal intercostal muscle thickening to diaphragm thickening fraction would improve the prediction of the trial outcome. Intercostal thickening fraction was higher in patients who failed the trial and appears to predict reasonably well the outcome of the spontaneous breathing trial, in a fashion opposite to the diaphragm thickening fraction (the higher the parasternal intercostal muscle thickening, the worse the outcome). However, parasternal intercostal muscle thickening did not perform better than the diaphragm thickening fraction, nor did the combination of both indices. Nevertheless, we believe our findings are of importance since diaphragm ultrasound is not always feasible and parasternal intercostal muscle thickening could be an interesting alternative. Documenting an increased parasternal intercostal muscle thickening before starting the spontaneous breathing trial could be relevant insofar as it may encourage caregivers to search for a reason susceptible to destabilizing the respiratory load–capacity balance.

As per our results in healthy breathing at rest, parasternal intercostal muscle thickening is expected to be as low as possible. Otherwise, it may be a sign of extradiaphragmatic respiratory muscle recruitment suggesting a patient's inspiratory effort is inappropriate. This may be potentially relevant in the context of increasing awareness of the adverse effects of both strong and weak respiratory efforts during mechanical ventilation on patient outcomes.<sup>40</sup> Since monitoring patient inspiratory effort is rarely done in routine because it requires an invasive procedure (esophageal catheter), performing parasternal intercostal ultrasound could be an alternative approach to provide a qualitative estimate of high inspiratory effort.

## Limits

Our study has limitations. First, all ultrasound procedures were performed on the right side only in the study. This approach was chosen to facilitate the acquisition of ultrasound images. In addition, we assumed parasternal intercostal muscle thickening of the right parasternal intercostal muscle to be a surrogate of the overall parasternal intercostal function since we did not assess all parasternal intercostal muscles separately. However, this approach is usually taken in such physiologic studies, in particular when using electromyogram.<sup>28</sup> Second, the parasternal intercostal muscle thickening cut-off to predict a spontaneous breathing trial outcome was determined while patients were receiving a standardized amount of ventilator support (*i.e.*, pressure support level targeting a tidal volume of 6 to 8 ml/kg of ideal body weight). Therefore, this cut-off may only be valid in the ventilatory conditions under which measurements were performed. Such ventilatory settings, however, are in line with common practices and recommendations in the ICU setting and therefore are easily generalizable. Third, the causes of spontaneous breathing trial failure were not documented and it is likely that several reasons may explain the failure of the spontaneous breathing trial. However, the ultrasound measurements were made before conducting the spontaneous breathing trial while the patients were supposed to be adequately assisted. Therefore, the use of ultrasound to detect situations at high risk of spontaneous breathing trial failure remains clinically relevant, whatever the causes of failure. Fourth, while the use of respiratory muscles ultrasound is growing in the ICU, it remains challenging to generalize its use to nonexpert operators. Currently, there is no standard definition of adequate training. As a monocentric and pilot study, our findings warrant further confirmation with a larger number of patients and nonexpert ultrasound observers.

## Conclusion

Parasternal intercostal muscle ultrasound appears feasible and potentially helpful in mechanically ventilated patients to estimate inadequate inspiratory efforts in case of unbalanced load–capacity respiratory capacity. In the context of increasing awareness of the risk of overestimation and underestimation of patient's inspiratory effort, parasternal intercostal muscle and diaphragm ultrasound may constitute a valuable alternative to the classical invasive monitoring tools.

## Research Support

Dr. Dres was supported by: the French Intensive Care Society (SRLF Bourse de Mobilité 2015); the 2015 Short Term Fellowship program of the European Respiratory Society; the 2015 Bernhard Dräger Award for advanced treatment of acute respiratory failure of the European Society of Intensive Care Medicine; the Public Assistance – Paris Hospitals; the Foundation for Medical Research

(FDM 20150734498); and by Mitacs Globalink Sorbonne Universités. Dr. Dubé was supported by a research grant from the Quebec Respiratory Health Network and by a fellowship grant from the Montreal University Hospital Center.

## Competing Interests

Dr. Demoule reports personal fees and nonfinancial support from Medtronic (Dublin, Ireland), grants, personal fees and nonfinancial support from Philips (Amsterdam, The Netherlands), personal fees from Baxter (Deerfield, Illinois), personal fees from Hamilton (Schaumburg, Illinois), grants and nonfinancial support from Fisher & Paykel (Auckland, New Zealand), grants from French Ministry of Health (Paris, France), personal fees from Getinge (Wayne, New Jersey), grants and personal fees from Respinor (Oslo, Norway), and grants and nonfinancial support from Lungpacer (Exton, Pennsylvania). Dr. Dres received personal fees from Lungpacer Inc. Dr. Dubé received personal fees from Grifols (Barcelona, Spain), Boehringer Ingelheim (Ingelheim am Rhein, Germany), and Roche (Basel, Switzerland), and has signed clinical research contracts with Sanofi (Paris, France), Roche, and Boehringer Ingelheim. Dr. Similowski has received personal fees from Lungpacer Inc. and is a member of the board of a research association that has received, over the past ten years, unrestricted research grants from Maquet (Rastatt, Germany), Hamilton, Covidien (Dublin, Ireland), and Philips; he is the head of a research unit (UMRS 1158) that has signed research contracts with Air Liquide Medical Systems, (Antony, France); he is listed as inventor or coinventor on several patents, granted or pending, describing a brain–ventilator interface. Dr. Brochard's research laboratory received research grants from Covidien, General Electric (Boston, Massachusetts), Fisher & Paykel, Maquet (with St. Michael's Hospital), and Philips, and reports receiving equipment from Philips, Sentec (Fenton, Missouri), and Air Liquide. The other authors have no conflict of interest to disclose.

## Correspondence

Address correspondence to Dr. Dres: Service de Pneumologie, Médecine intensive – Réanimation, Groupe Hospitalier Pitié-Salpêtrière, 47-83 Boulevard de l'Hôpital, 75651 Paris Cedex 13, France. martin.dres@aphp.fr. This article may be accessed for personal use at no charge through the Journal Web site, [www.anesthesiology.org](http://www.anesthesiology.org).

## References

1. Doorduyn J, van Hees HW, van der Hoeven JG, Heunks LM: Monitoring of the respiratory muscles in the critically ill. *Am J Respir Crit Care Med* 2013; 187:20–7
2. Polkey MI, Green M, Moxham J: Measurement of respiratory muscle strength. *Thorax* 1995; 50:1131–5

3. Schmidt M, Kindler F, Gottfried SB, Raux M, Hug F, Similowski T, Demoule A: Dyspnea and surface inspiratory electromyograms in mechanically ventilated patients. *Intensive Care Med* 2013; 39:1368–76
4. American Thoracic Society/European Respiratory Society: ATS/ERS Statement on respiratory muscle testing. *Am J Respir Crit Care Med* 2002; 166:518–624
5. Dres M, Demoule A: Diaphragm dysfunction during weaning from mechanical ventilation: An underestimated phenomenon with clinical implications. *Crit Care* 2018; 22:73
6. Matamis D, Soilemezi E, Tsagourias M, Akoumianaki E, Dimassi S, Boroli F, Richard JC, Brochard L: Sonographic evaluation of the diaphragm in critically ill patients. Technique and clinical applications. *Intensive Care Med* 2013; 39:801–10
7. Cappello M, de Troyer A: Interaction between left and right intercostal muscles in airway pressure generation. *J Appl Physiol* (1985) 2000; 88:817–20
8. Parthasarathy S, Jubran A, Laghi F, Tobin MJ: Sternomastoid, rib cage, and expiratory muscle activity during weaning failure. *J Appl Physiol* (1985) 2007; 103:140–7
9. Hillman DR, Finucane KE: Respiratory pressure partitioning during quiet inspiration in unilateral and bilateral diaphragmatic weakness. *Am Rev Respir Dis* 1988; 137:1401–5
10. Wallbridge P, Parry SM, Das S, Law C, Hammerschlag G, Irving L, Hew M, Steinfort D: Parasternal intercostal muscle ultrasound in chronic obstructive pulmonary disease correlates with spirometric severity. *Sci Rep* 2018; 8:15274
11. Suh ES, Mandal S, Harding R, Ramsay M, Kamalanathan M, Henderson K, O’Kane K, Douiri A, Hopkinson NS, Polkey MI, Rafferty G, Murphy PB, Moxham J, Hart N: Neural respiratory drive predicts clinical deterioration and safe discharge in exacerbations of COPD. *Thorax* 2015; 70:1123–30
12. Dubé BP, Dres M, Mayaux J, Demiri S, Similowski T, Demoule A: Ultrasound evaluation of diaphragm function in mechanically ventilated patients: Comparison to phrenic stimulation and prognostic implications. *Thorax* 2017; 72:811–8
13. Dres M, Dubé BP, Mayaux J, Delemazure J, Reuter D, Brochard L, Similowski T, Demoule A: Coexistence and impact of limb muscle and diaphragm weakness at time of liberation from mechanical ventilation in medical intensive care unit patients. *Am J Respir Crit Care Med* 2017; 195:57–66
14. Dres M, Goligher EC, Dubé BP, Morawiec E, Dangers L, Reuter D, Mayaux J, Similowski T, Demoule A: Diaphragm function and weaning from mechanical ventilation: An ultrasound and phrenic nerve stimulation clinical study. *Ann Intensive Care* 2018; 8:53
15. Boles JM, Bion J, Connors A, Herridge M, Marsh B, Melot C, Pearl R, Silverman H, Stanchina M, Vieillard-Baron A, Welte T: Weaning from mechanical ventilation. *Eur Respir J* 2007; 29:1033–56
16. Goligher EC, Laghi F, Detsky ME, Farias P, Murray A, Brace D, Brochard LJ, Bolz SS, Sebastien-Bolz S, Rubenfeld GD, Kavanagh BP, Ferguson ND: Measuring diaphragm thickness with ultrasound in mechanically ventilated patients: feasibility, reproducibility and validity. *Intensive Care Med* 2015; 41:642–9
17. Vivier E, Mekontso Dessap A, Dimassi S, Vargas F, Lyazidi A, Thille AW, Brochard L: Diaphragm ultrasonography to estimate the work of breathing during non-invasive ventilation. *Intensive Care Med* 2012; 38:796–803
18. Umbrello M, Formenti P, Longhi D, Galimberti A, Piva I, Pezzi A, Mistraretti G, Marini JJ, Iapichino G: Diaphragm ultrasound as indicator of respiratory effort in critically ill patients undergoing assisted mechanical ventilation: A pilot clinical study. *Crit Care* 2015; 19:161
19. DiNino E, Gartman EJ, Sethi JM, McCool FD: Diaphragm ultrasound as a predictor of successful extubation from mechanical ventilation. *Thorax* 2014; 69:423–7
20. Sklar MC, Dres M, Rittayamai N, West B, Grieco DL, Telias I, Junhasavasdikul D, Rauseo M, Pham T, Madotto F, Campbell C, Tullis E, Brochard L: High-flow nasal oxygen *versus* noninvasive ventilation in adult patients with cystic fibrosis: A randomized crossover physiological study. *Ann Intensive Care* 2018; 8:85
21. Bossuyt PM, Cohen JF, Gatsonis CA, Korevaar DA; STARD group: STARD 2015: Updated reporting guidelines for all diagnostic accuracy studies. *Ann Transl Med* 2016; 4:85
22. DeLong ER, DeLong DM, Clarke-Pearson DL: Comparing the areas under two or more correlated receiver operating characteristic curves: A nonparametric approach. *Biometrics* 1988; 44:837–45
23. De Troyer A: Inspiratory elevation of the ribs in the dog: Primary role of the parasternals. *J Appl Physiol* (1985) 1991; 70:1447–55
24. De Troyer A, Kirkwood PA, Wilson TA: Respiratory action of the intercostal muscles. *Physiol Rev* 2005; 85:717–56
25. Raper AJ, Thompson WT Jr, Shapiro W, Patterson JL Jr: Scalene and sternomastoid muscle function. *J Appl Physiol* 1966; 21:497–502
26. De Troyer A, Pecche R, Yernault JC, Estenne M: Neck muscle activity in patients with severe chronic obstructive pulmonary disease. *Am J Respir Crit Care Med* 1994; 150:41–7

27. Brochard L, Harf A, Lorino H, Lemaire F: Inspiratory pressure support prevents diaphragmatic fatigue during weaning from mechanical ventilation. *Am Rev Respir Dis* 1989; 139:513–21
28. Murphy PB, Kumar A, Reilly C, Jolley C, Walterspacher S, Fedele F, Hopkinson NS, Man WD, Polkey MI, Moxham J, Hart N: Neural respiratory drive as a physiological biomarker to monitor change during acute exacerbations of COPD. *Thorax* 2011; 66:602–8
29. Diab KM, Shalabi A, Sevastik JA, Güntner P: A method for morphometric study of the intercostal muscles by high-resolution ultrasound. *Eur Spine J* 1998; 7:224–8
30. Cala SJ, Kenyon CM, Lee A, Watkin K, Macklem PT, Rochester DF: Respiratory ultrasonography of human parasternal intercostal muscle *in vivo*. *Ultrasound Med Biol* 1998; 24:313–26
31. Ninane V, Farkas GA, Baer R, de Troyer A: Mechanism of rib cage inspiratory muscle recruitment in diaphragmatic paralysis. *Am Rev Respir Dis* 1989; 139:146–9
32. Brichant JF, De Troyer A: On the intercostal muscle compensation for diaphragmatic paralysis in the dog. *J Physiol* 1997; 500 (Pt 1):245–53
33. Jaiswal PB, Davenport PW: Intercostal muscle motor behavior during tracheal occlusion conditioning in conscious rats. *J Appl Physiol* (1985) 2016; 120:792–800
34. Macklem PT, Gross D, Grassino GA, Roussos C: Partitioning of inspiratory pressure swings between diaphragm and intercostal/accessory muscles. *J Appl Physiol Respir Environ Exerc Physiol* 1978; 44:200–8
35. Similowski T, Attali V, Bensimon G, Salachas F, Mehiri S, Arnulf I, Lacomblez L, Zelter M, Meininger V, Derenne JP: Diaphragmatic dysfunction and dyspnoea in amyotrophic lateral sclerosis. *Eur Respir J* 2000; 15:332–7
36. Ward ME, Eidelman D, Stubbing DG, Bellemare F, Macklem PT: Respiratory sensation and pattern of respiratory muscle activation during diaphragm fatigue. *J Appl Physiol* (1985) 1988; 65:2181–9
37. Nochmovitz ML, Goldman M, Mitra J, Cherniack NS: Respiratory responses in reversible diaphragm paralysis. *J Appl Physiol Respir Environ Exerc Physiol* 1981; 51:1150–6
38. McConville JF, Kress JP: Weaning patients from the ventilator. *N Engl J Med* 2012; 367:2233–9
39. Vivier E, Muller M, Putegnat JB, Steyer J, Barrau S, Boissier F, Bourdin G, Mekontso-Dessap A, Levrat A, Pommier C, Thille AW: Inability of diaphragm ultrasound to predict extubation failure: A multicenter study. *Chest* 2019; 155:1131–9
40. Vaporidi K, Akoumianaki E, Telias I, Goligher EC, Brochard L, Georgopoulos D: Respiratory drive in critically ill patients. *Pathophysiology and clinical implications*. *Am J Respir Crit Care Med* 2020; 201:20–32
